# Supplementary material
Source: PubMed Central journal article supplement (PMC4836974)
Supplement: NIHMS750406-supplement-1.pdf [file NIHMS750406-supplement-1.pdf]

## Supplementary Information

### Light Controlled Modulation of Gene Expression by Chemical Optoepigenetic Probes

**Authors:** Surya A. Reis<sup>2,†</sup>, Balaram Ghosh<sup>1,2,†,‡</sup>, J. Adam Hendricks<sup>1</sup>, D. Miklos Szantai-Kis<sup>1</sup>, Lisa Törk<sup>1</sup>, Kenneth N. Ross<sup>3</sup>, Justin Lamb<sup>4</sup>, Willis Read-Button<sup>4</sup>, Baixue Zheng<sup>4</sup>, Hongtao Wang<sup>5</sup>, Christopher Salthouse<sup>5</sup>, Stephen J. Haggarty<sup>2,6,\*</sup>, Ralph Mazitschek<sup>1,6,\*</sup>

#### Affiliations:

<sup>1</sup>Center for Systems Biology, Massachusetts General Hospital, Harvard Medical School, 185 Cambridge Street, Boston, MA 02114, USA

<sup>2</sup>Chemical Neurobiology Laboratory, Center for Human Genetic Research, Massachusetts General Hospital, Departments of Neurology & Psychiatry, Harvard Medical School, 185 Cambridge Street, Boston, MA 02114, USA

<sup>3</sup>Center for Cancer Research, Massachusetts General Hospital, Harvard Medical School, 185 Cambridge Street, Boston, MA 02114, USA

<sup>4</sup>Genometry Inc., One Kendall Square, Cambridge, MA 02139, USA

<sup>5</sup>Department of Electrical & Computer Engineering & Center for Personalized Health Monitoring, University of Massachusetts, 100 Natural Resources Rd., Amherst, MA 01003, USA

<sup>6</sup>Broad Institute of Harvard & Massachusetts Institute of Technology, Cambridge, MA 02142, USA

\*Correspondence to: [shaggarty@mgh.harvard.edu](mailto:shaggarty@mgh.harvard.edu) (SJH), [rmazitschek@mgh.harvard.edu](mailto:rmazitschek@mgh.harvard.edu) (RM)

†Contributed equally

‡ Current affiliation: Department of Pharmacy, BITS-Pilani at Hyderabad Campus, India

500 078

## Supplementary Results

Supplementary Figure 1. UV-Vis absorbance spectra in PBS of COMET probes.

Supplementary Figure 2. Schematic of custom designed sensing circuit for photophysical measurements.

Supplementary Figure 3. Schematic diagram of the measurement system for photophysical profiling.

Supplementary Figure 4. Components of LED-array assembly.

Supplementary Figure 5. Design of microprocessor-controlled 12x8 LED-arrays compatible with 96-well microtiter plates.

Supplementary Figure 6. Wavelength dependent activity of BG14 against HDAC3.

Supplementary Figure 7. BG12 Optical properties and absence of light-dependent inhibitory activity toward recombinant HDACs.

Supplementary Figure 8. Full Western Blots of Histone H3K9 acetylation

Supplementary Figure 9. Light exposure time-dependent activity of BG14 in human cells.

Supplementary Figure 10. Heatmap of differentially regulated genes from L1000 mRNA profiles.

Supplementary Figure 11. Gene Set Enrichment Analysis (GSEA) of CI-994 regulated genes and BG14.

Supplementary Figure 12. Summary schematic of L1000 gene signature classifications to determine 'on' and 'off' target genes.

Supplementary Figure 13. Characterization of COMET-mediated gene expression signatures in human cells

Supplementary Figure 14. Reduction of 7-AMC fluorescence in the presence of COMET probes.

Supplementary Figure 15. Templates for Transcriptional analysis.

Supplementary Figure 16. ESP of the zinc binding nitrogen and oxygen for CI-994, trans-BG14 and cis-BG14.

Supplementary Data Set 1: Gene expression SNR scores; BG14, CI-994, and C60 response gene IDs

Supplementary Movies 1: LED array

## Supplementary Figures

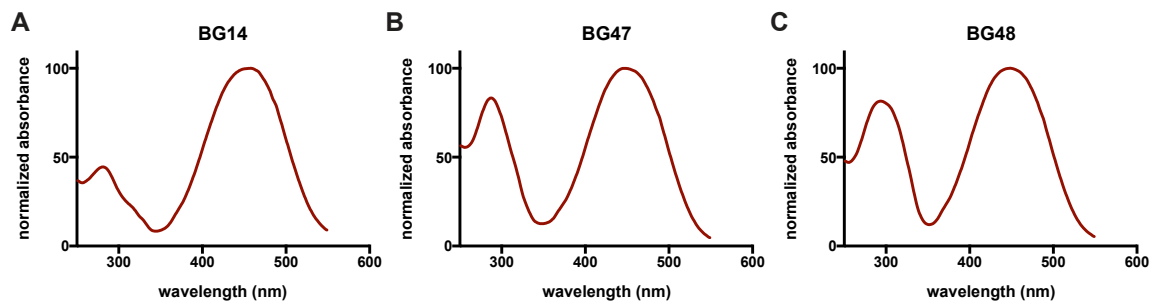

**Supplementary Figure 1. UV-Vis absorbance spectra of COMET probes in PBS. BG14 (A), BG47 (B) and BG48(C).**

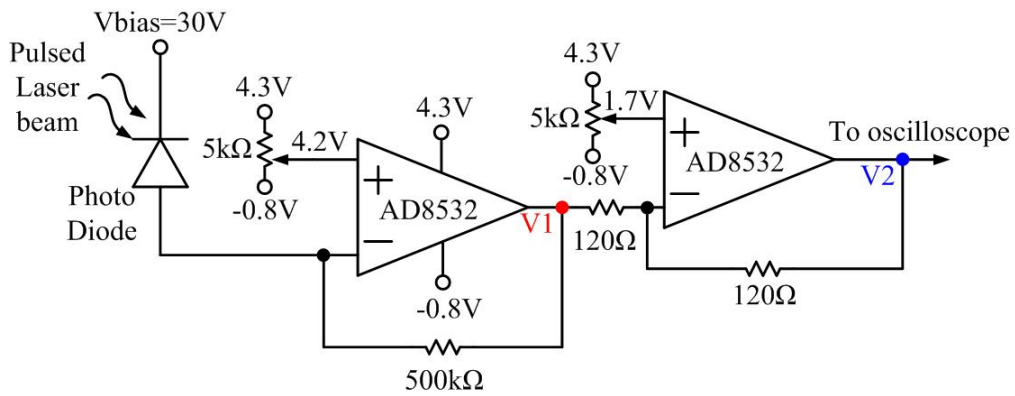

**Supplementary Figure 2. Schematic of custom designed sensing circuit for photophysical measurements.**

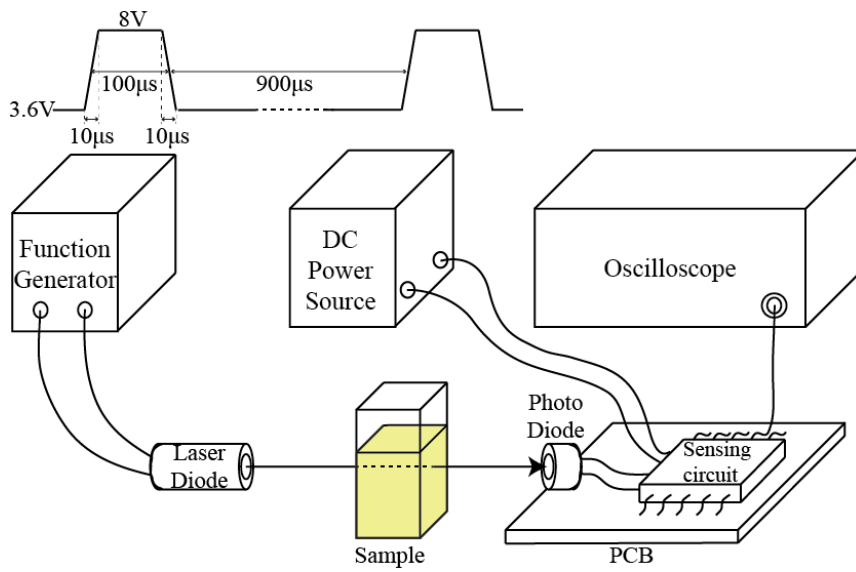

**Supplementary Figure 3. Schematic diagram of the measurement system for photophysical profiling.**

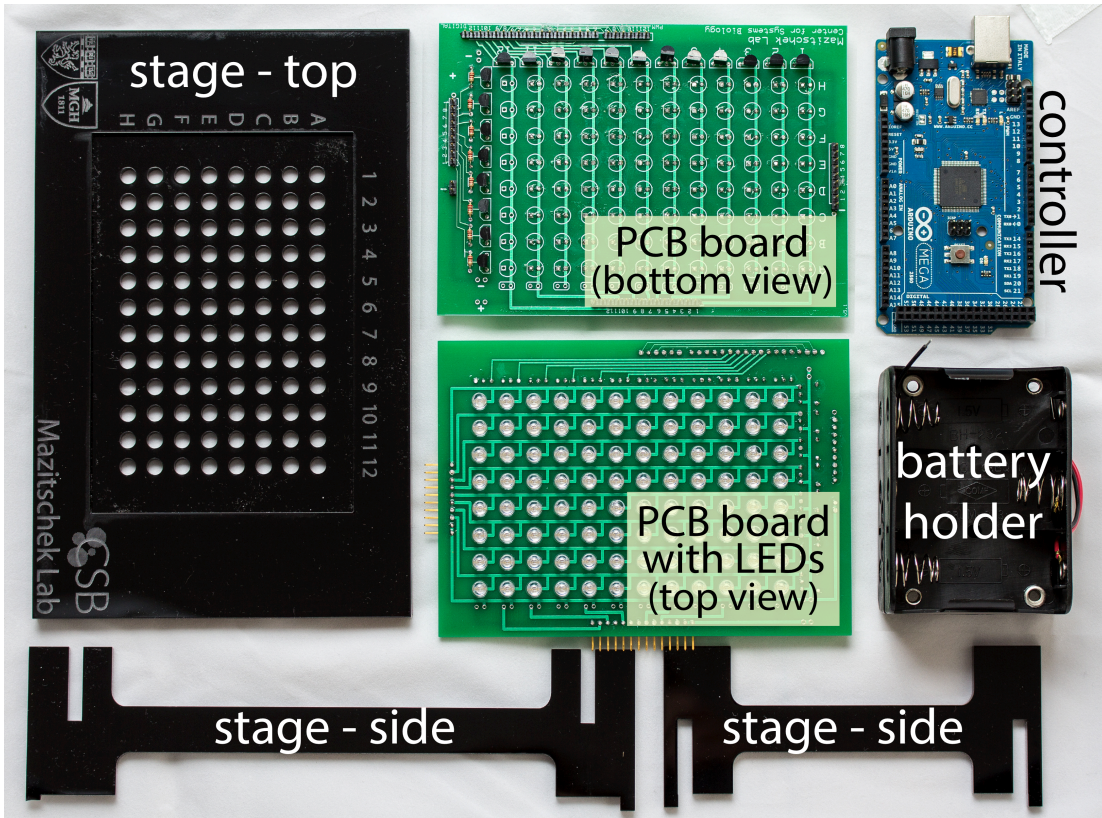

Supplementary Figure 4. Components of LED-array assembly.

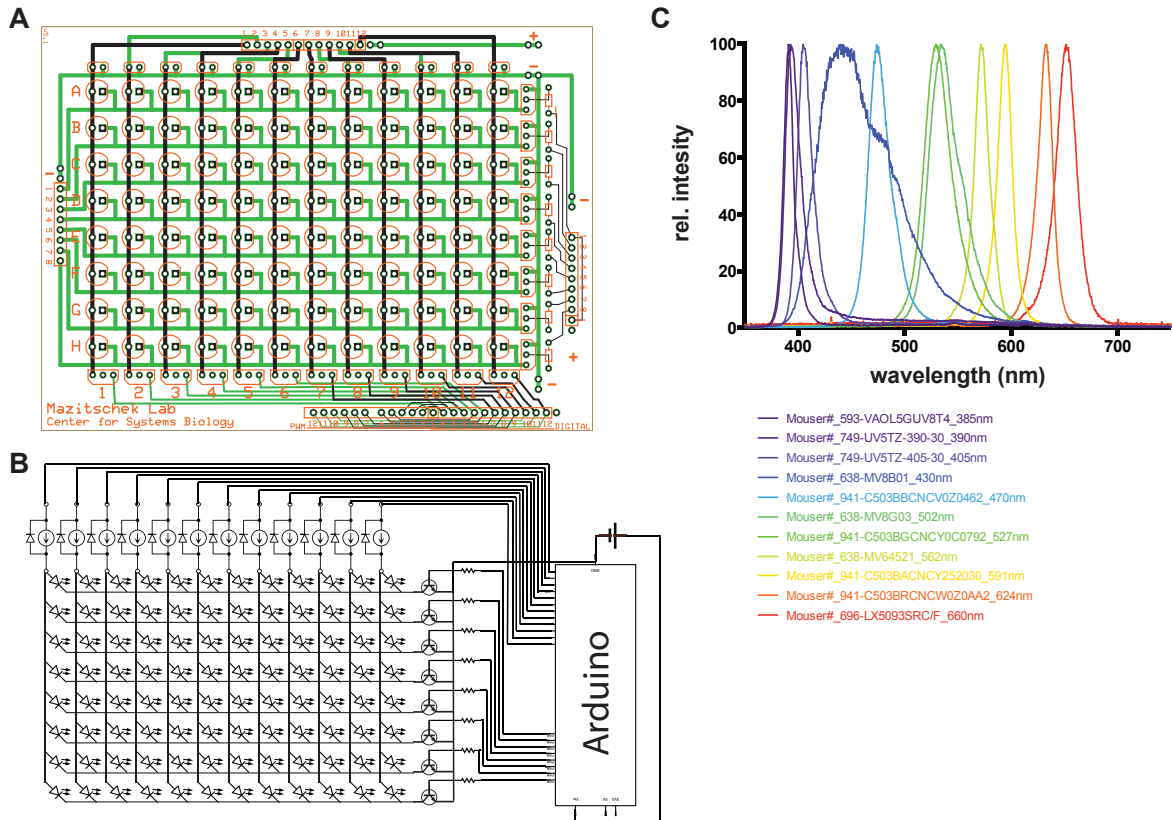

**Supplementary Figure 5. Design of microprocessor-controlled 12x8 LED-arrays compatible with 96-well microtiter plates. (A)** LED 12x8 matrix PCB design based upon the open-source Arduino platform ([www.arduino.cc](http://www.arduino.cc)). (top layer – black, bottom layer - green, silkscreen - orange). **(B)** Integrated circuit schematic. **(C)** Normalized LED emission profiles.

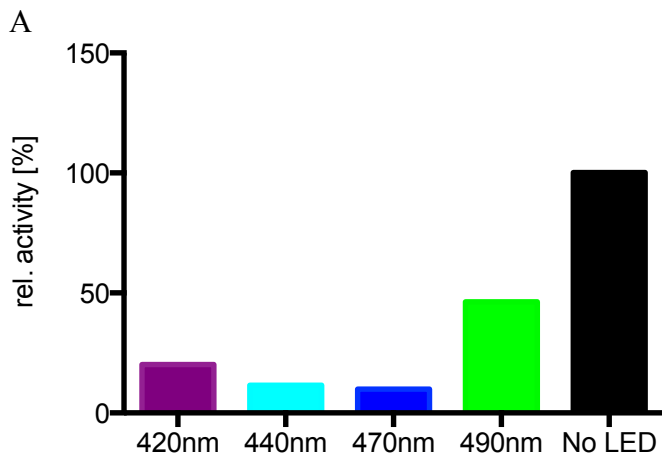

B

|          | Rep A | Rep B | Mean  |
|----------|-------|-------|-------|
| 420nm    | 73    | 104   | 88.5  |
| 440nm    | 31    | 71    | 51    |
| 470nm    | 52    | 35    | 43.5  |
| 490nm    | 187   | 220   | 203.5 |
| no light | 369   | 510   | 439.5 |

**Supplementary Figure 6. Wavelength dependent activity of BG14 against HDAC3.**

(A) HDAC3 was incubated with BG14 (20  $\mu$ M) and exposed to LEDs with varying wavelengths for 15 min prior to addition of HDAC substrate and trypsin. Values represent means of duplicate measurements. (B) Source data for panel (A).

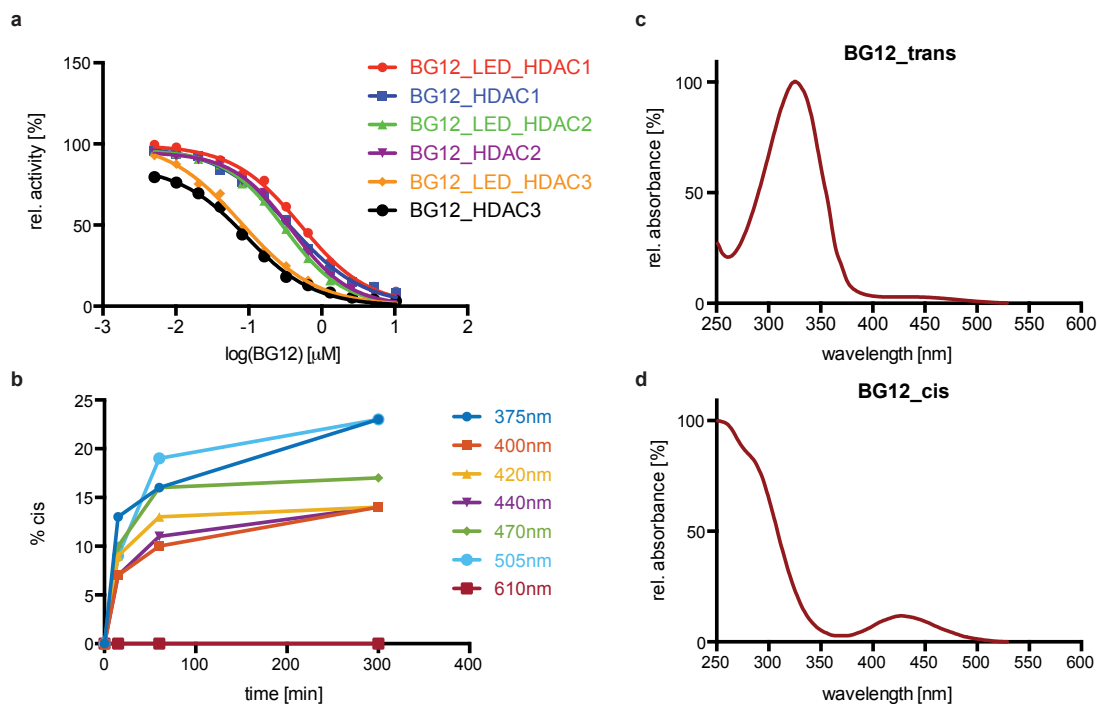

e

| concentration (assay) [ $\mu\text{M}$ ] | BG12_LED_HDAC1 | BG12_HDAC1 | BG12_LED_HDAC2 | BG12_HDAC2 | BG12_LED_HDAC3 | BG12_HDAC3 |
|-----------------------------------------|----------------|------------|----------------|------------|----------------|------------|
| 10.41667                                | 8.768          | 9.451      | 7.882          | 8.732      | 4.573          | 4.376      |
| 5.208333                                | 12.292         | 11.800     | 11.511         | 12.588     | 5.500          | 5.280      |
| 2.604167                                | 15.351         | 15.802     | 14.403         | 15.452     | 8.462          | 7.384      |
| 1.302083                                | 26.714         | 27.315     | 21.604         | 22.994     | 16.500         | 15.216     |
| 0.6510417                               | 45.343         | 44.947     | 34.760         | 36.177     | 30.021         | 28.988     |
| 0.3255208                               | 61.677         | 60.967     | 52.650         | 53.656     | 49.119         | 46.103     |
| 0.1627604                               | 78.694         | 76.058     | 67.364         | 69.179     | 66.667         | 63.112     |
| 0.08138021                              | 81.399         | 80.961     | 74.906         | 78.776     | 76.937         | 74.233     |
| 0.04069011                              | 90.986         | 89.211     | 81.285         | 86.786     | 88.909         | 85.605     |
| 0.02034505                              | 93.335         | 91.983     | 91.634         | 93.108     | 91.796         | 89.547     |
| 0.01017253                              | 99.317         | 96.613     | 92.541         | 95.093     | 95.047         | 93.087     |
| 0.005086263                             | 100.628        | 98.593     | 94.412         | 97.318     | 96.187         | 94.850     |

**Supplementary Figure 7. BG12 Optical properties and absence of light-dependent inhibitory activity toward recombinant HDACs.** (a) Dose dependent but absence of light dependent (470 nm, 17 mW/cm<sup>2</sup>) activity of BG12, a close structural analog of BG14 lacking only an electron donating dimethylamine substituent, against HDAC1-3 in both *trans*-geometry and *cis*-geometry. The absence of differential potency upon photoisomerization supports the conclusion of the importance of electronic properties of COMET probes for light dependent HDAC inhibition. Data represent mean values of duplicates. (b) Photoisomerization kinetics of BG12 to *cis*-geometry as a function of wavelength for BG12. Values represent individual measurements. (c) Relative absorbance spectra of BG12 in *trans*-geometry (d) Relative absorbance spectra of BG12 in *cis*-geometry. (e) Source data for panel (a).



**a**

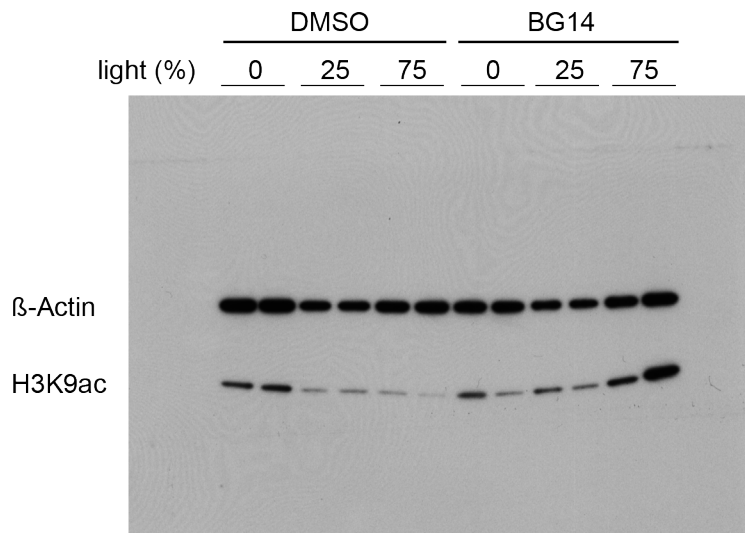

**b**

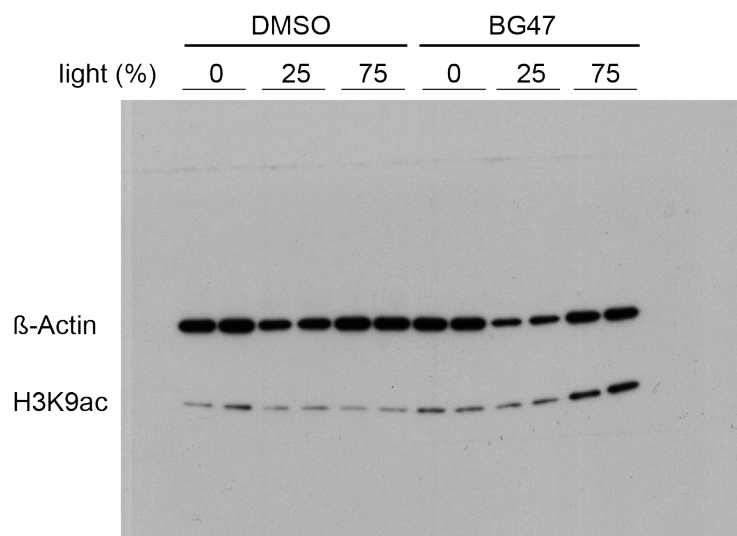

**c**

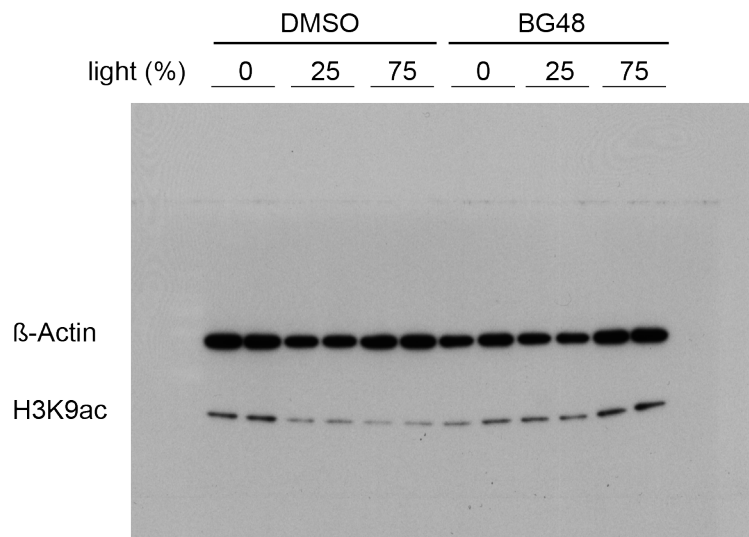

**Supplementary Figure 8 . Full Western Blots of Histone H3K9 acetylation**

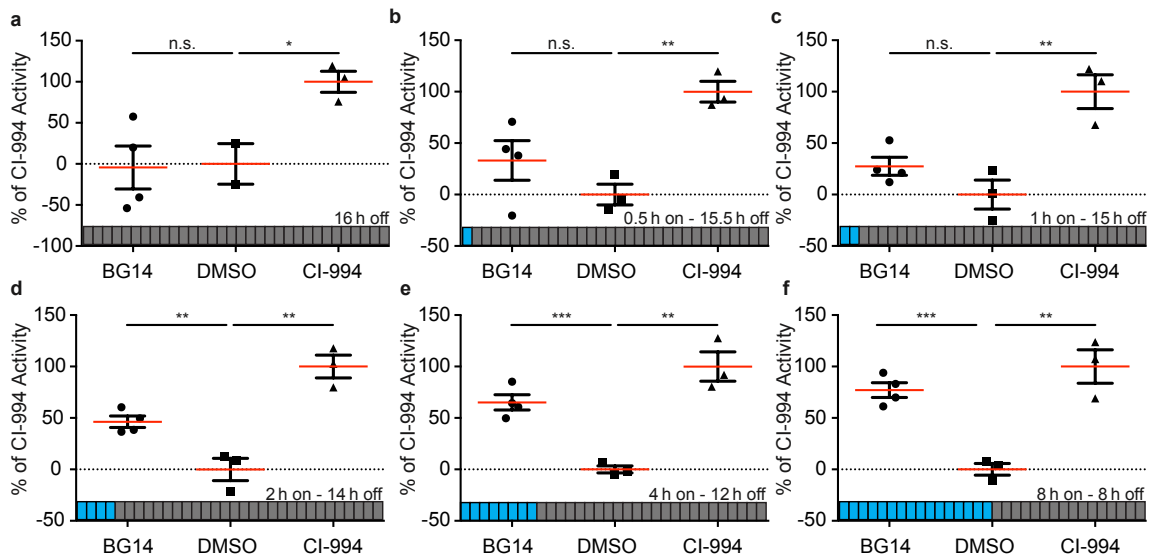

**Supplementary Figure 9. Light exposure time-dependent activity of BG14 in human cells.** Quantification of relative immunofluorescence intensity of H3K9ac upon treatment of MCF-7 cells with DMSO, CI-994 (25  $\mu$ M) and BG14 (25  $\mu$ M) for 16 h under varying duration of light exposure (470 nm, 8.5 mW/cm<sup>2</sup>, 1Hz, 50% duty cycle) at the beginning of the treatment period. No light (a), 0.5 h (b), 1 h (c), 2 h (d), 4 h (e), 8 h (f). The light/dark treatment is indicated by the timeline in each subpanel, each box represents a 30 min time increment. Blue – light on; Gray – light off. Cellular H3K9 acetylation levels are normalized within each group to the positive control CI-994 = 100% and DMSO = 0. A total of 9 fields/well were captured per treatments; treatments were done with  $\geq 3$ . Significance values (n.s. – not significant, \*\* p < 0.01, \*\*\* p < 0.001) were calculated using unpaired t-tests (Graphpad PRISM).

# L1000 BG14 16 hours (top 100 genes Cosine Distance – Sample Means)

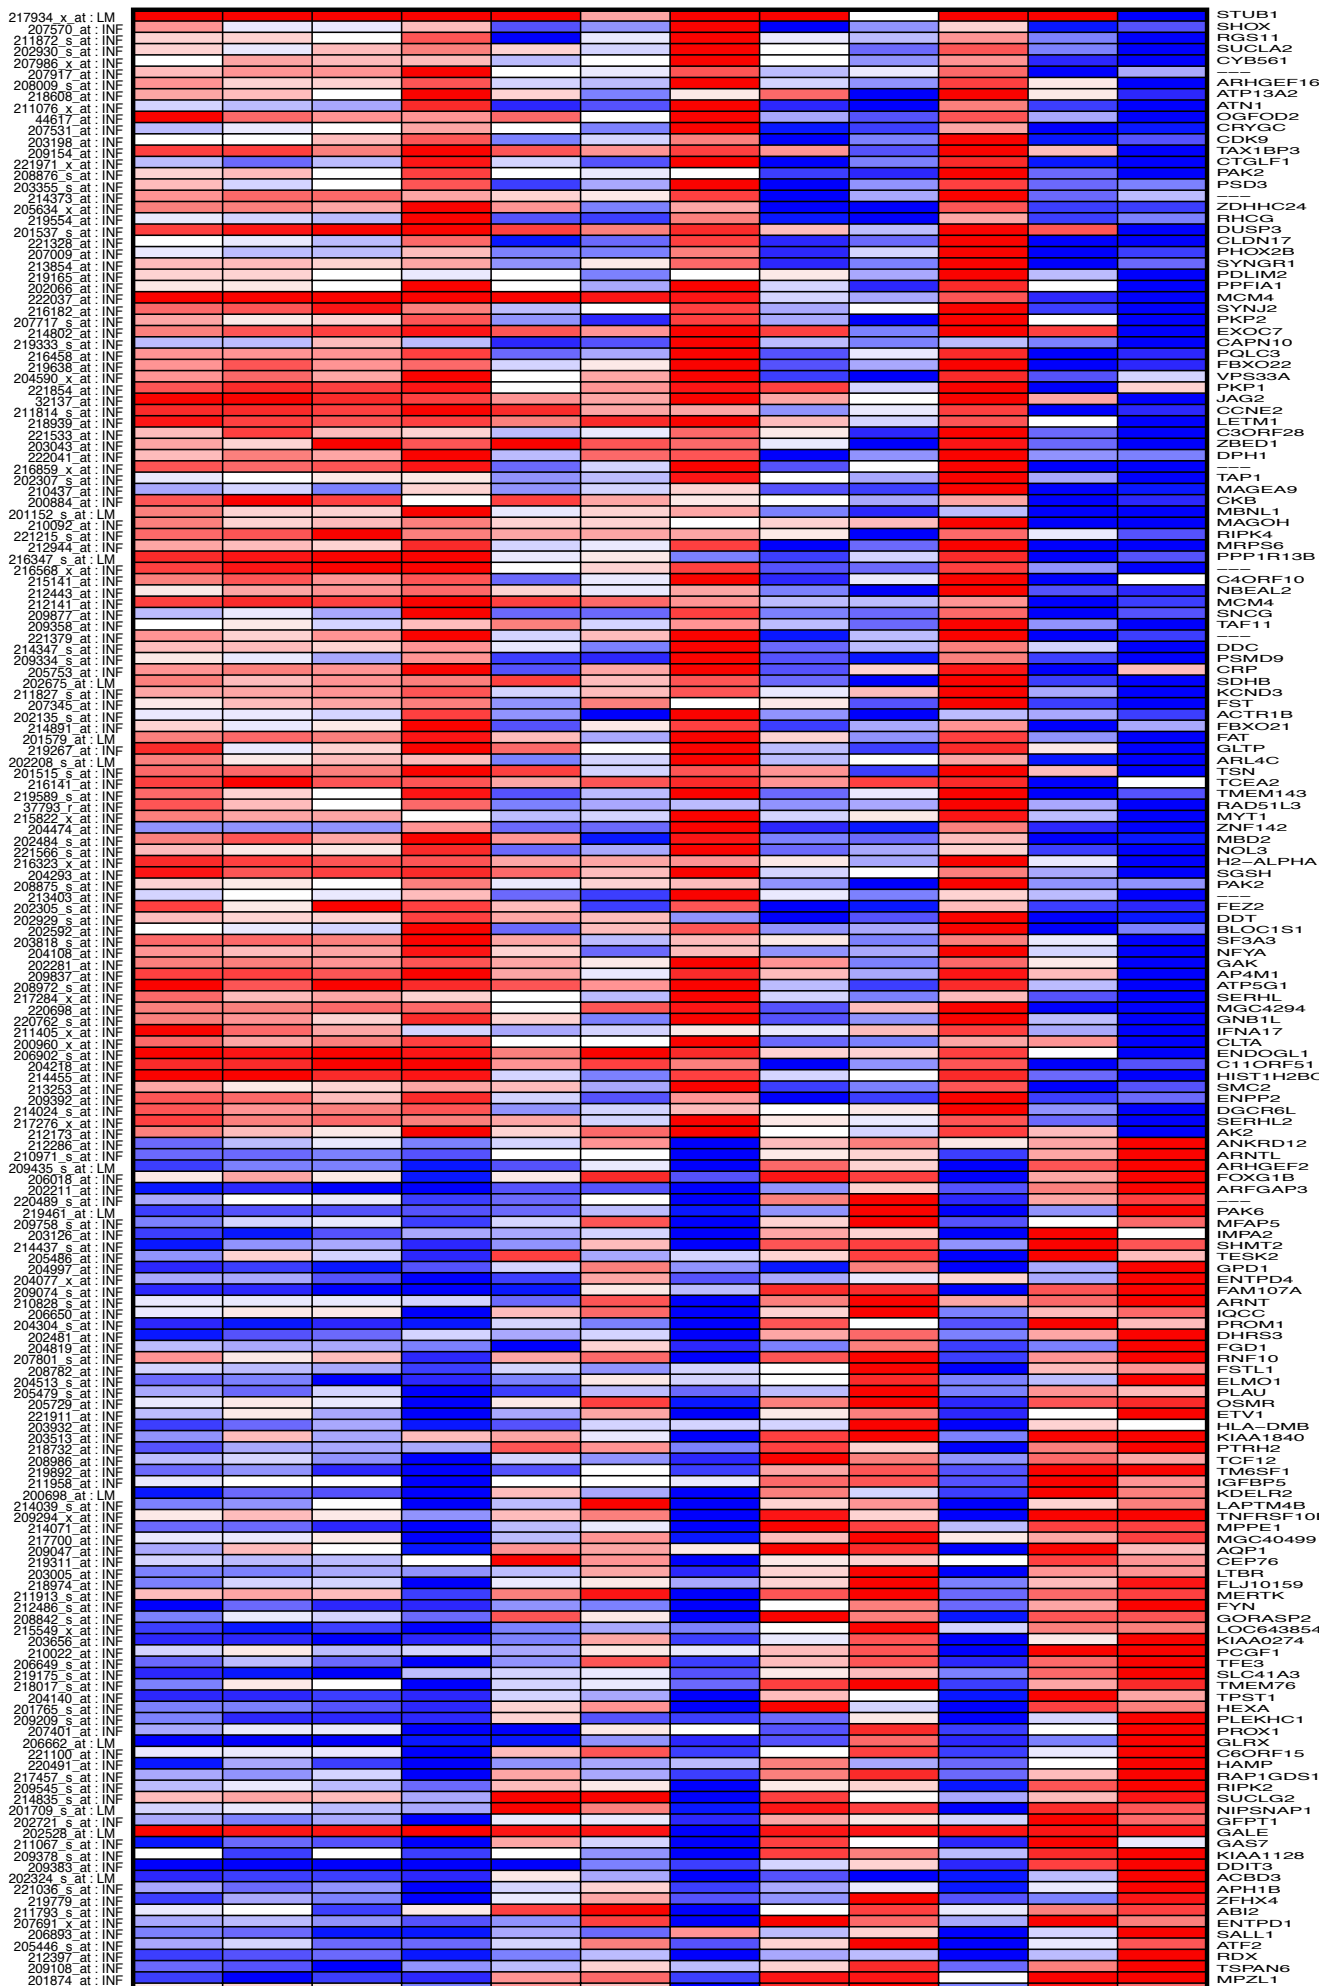

**Supplementary Figure 10. Heatmap of differentially regulated genes from L1000 mRNA profiles.** Top 100 up- and down-regulated transcripts (landmark and inferred genes) that are specifically modulated by BG14 in light dependent fashion. No significant transcriptional changes are observed by BG14 treatment alone or by light in the absence of inhibitor (control, 1  $\mu$ M, 5  $\mu$ M, 25  $\mu$ M; average n = 4 measurements).

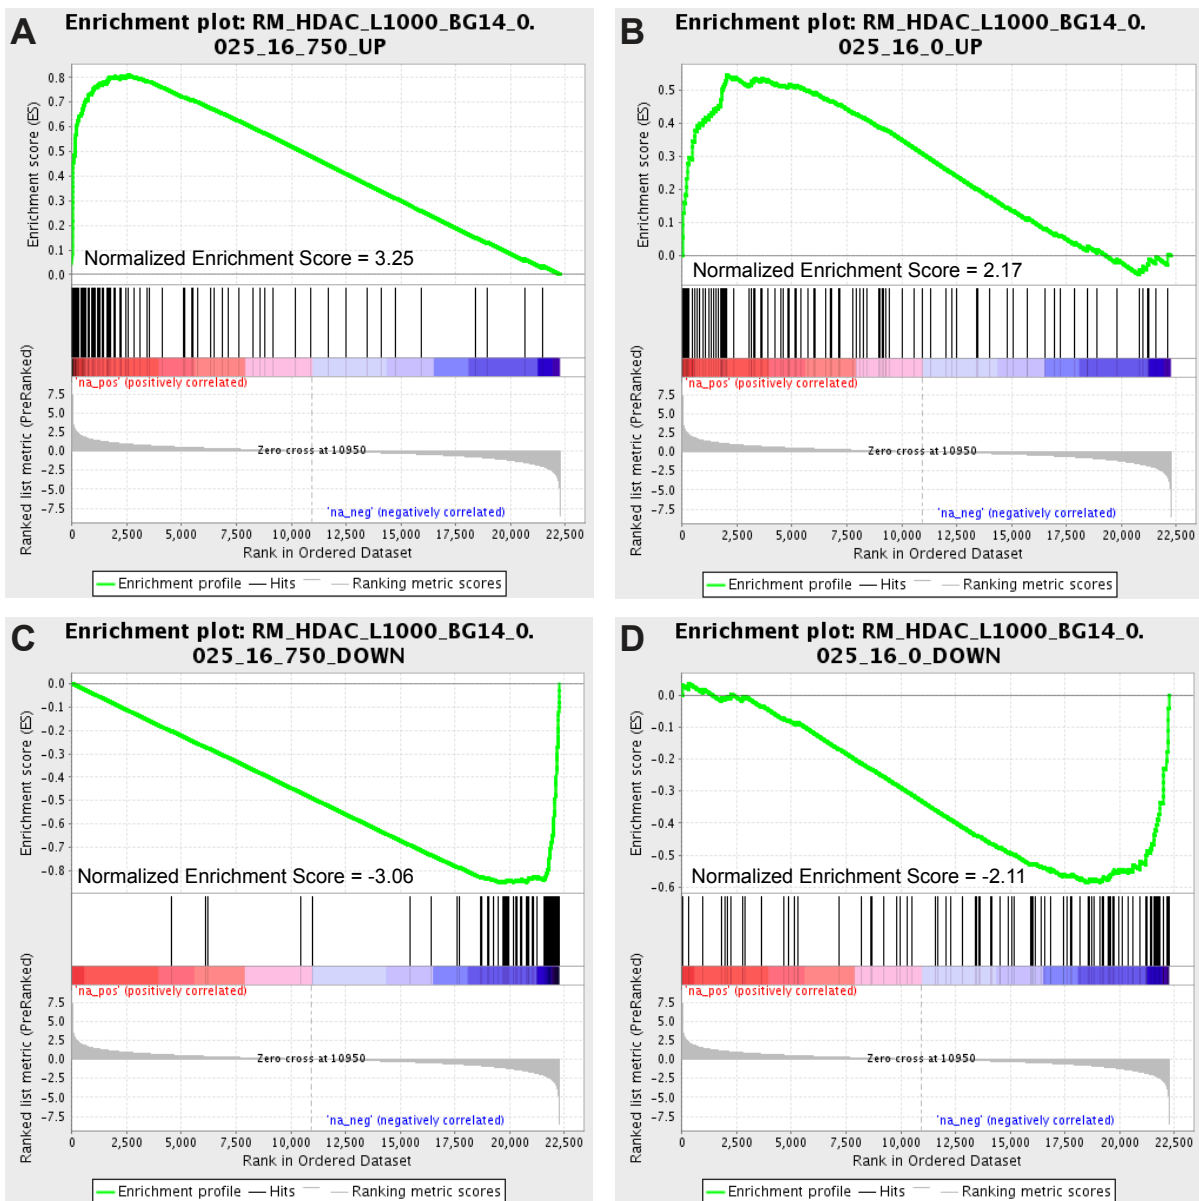

**Supplementary Figure 11. Gene Set Enrichment Analysis (GSEA) of CI-994 regulated genes and BG14.** Correlation of (a) BG14 upregulated genes (25  $\mu$ M, 16 h, light), (b) BG14 upregulated genes (25  $\mu$ M, 16 h, no light), (c) BG14 downregulated genes (25  $\mu$ M, 16 h, light), (d) BG14 downregulated genes (25  $\mu$ M, 16 h, no light). The more positive the nES the greater the gene set enrichment from BG14 at the top of the ranked list from CI-994; the more negative nES the greater the gene set enrichment from BG14 at the bottom of the ranked list from CI-994.  $p < 0.001$  and FDR  $q < 0.001$ .

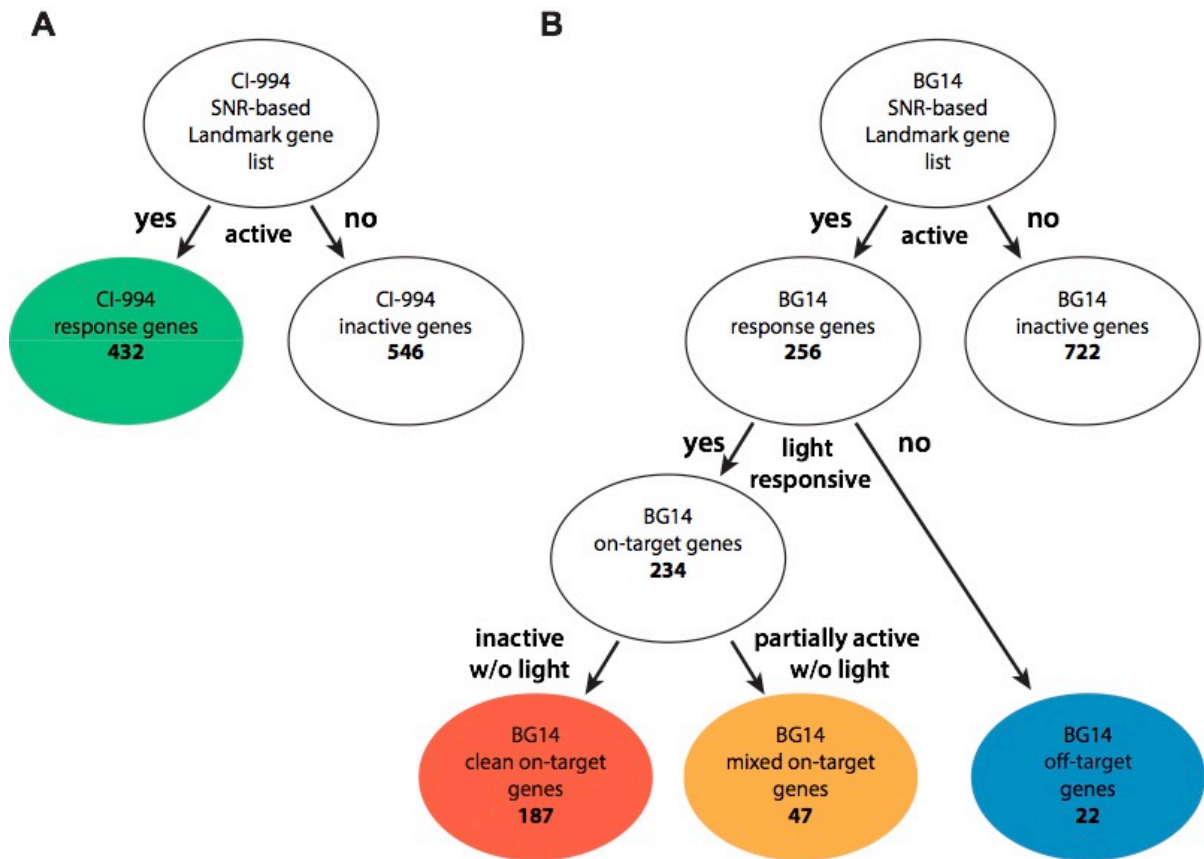

**Supplementary Figure 12. Summary schematic of L1000 gene signature classifications to determine ‘on’ and ‘off’ target genes.** On-target genes are defined experimentally as those that show light responsiveness with off-target genes defined as those that are affected by BG14 treatment but are not light responsive.

**a** GeneMANIA analysis of core gene set

| Feature/Network                                                  | FDR      | Genes in Network/<br>Genome(Landmark Genes) |
|------------------------------------------------------------------|----------|---------------------------------------------|
| interphase of mitotic cell cycle                                 | 5.90E-05 | 13/258(49)                                  |
| interphase                                                       | 5.90E-05 | 13/263(51)                                  |
| S phase of mitotic cell cycle                                    | 5.90E-05 | 10/132(34)                                  |
| S phase                                                          | 7.25E-05 | 10/139(36)                                  |
| G1/S transition of mitotic cell cycle                            | 7.43E-05 | 11/184(32)                                  |
| cell cycle checkpoint                                            | 6.05E-04 | 11/230(32)                                  |
| positive regulation of release of cytochrome c from mitochondria | 1.38E-02 | 4/19(4)                                     |
| regulation of mitochondrion organization                         | 1.60E-02 | 5/43(5)                                     |
| positive regulation of cell cycle arrest                         | 2.02E-02 | 6/79(17)                                    |
| signal transduction by p53 class mediator                        | 2.79E-02 | 7/128(19)                                   |
| positive regulation of mitochondrion organization                | 2.79E-02 | 4/25(4)                                     |
| regulation of cell cycle arrest                                  | 3.43E-02 | 6/91(18)                                    |
| regulation of release of cytochrome c from mitochondria          | 3.76E-02 | 4/28(5)                                     |

**b**

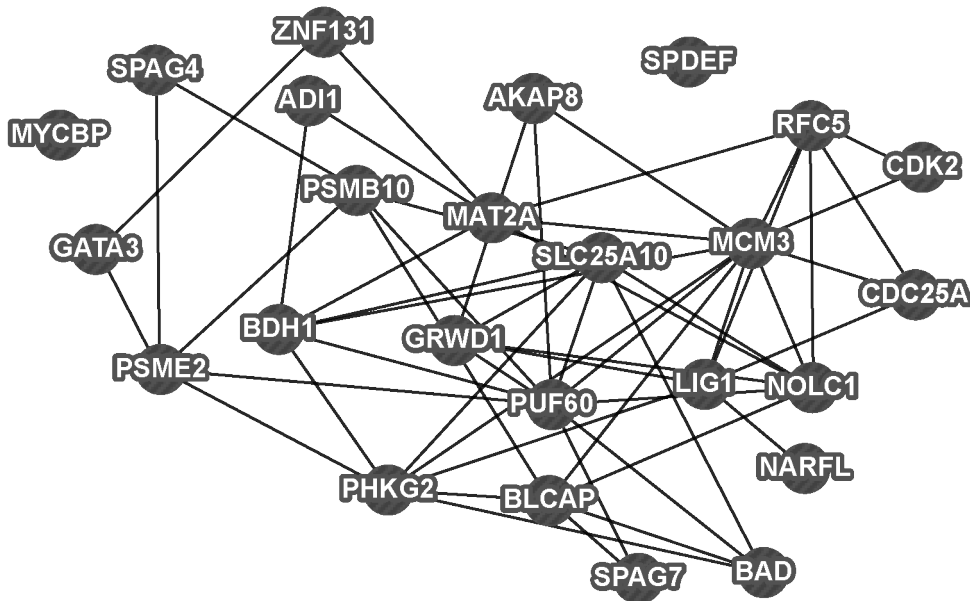

**Supplementary Figure 13. Characterization of COMET-mediated gene expression signatures in human cells. (a)** Statistically significant (FDR < 0.05) cellular networks identified by GeneMANIA analysis of the Core Gene Set comprising 120 genes shared between CI-994 and BG14 (on-target) in the presence of light. **(b)** GeneMANIA network analysis of protein-protein interactions between the top 25 down-regulated genes within the Core Gene Set.

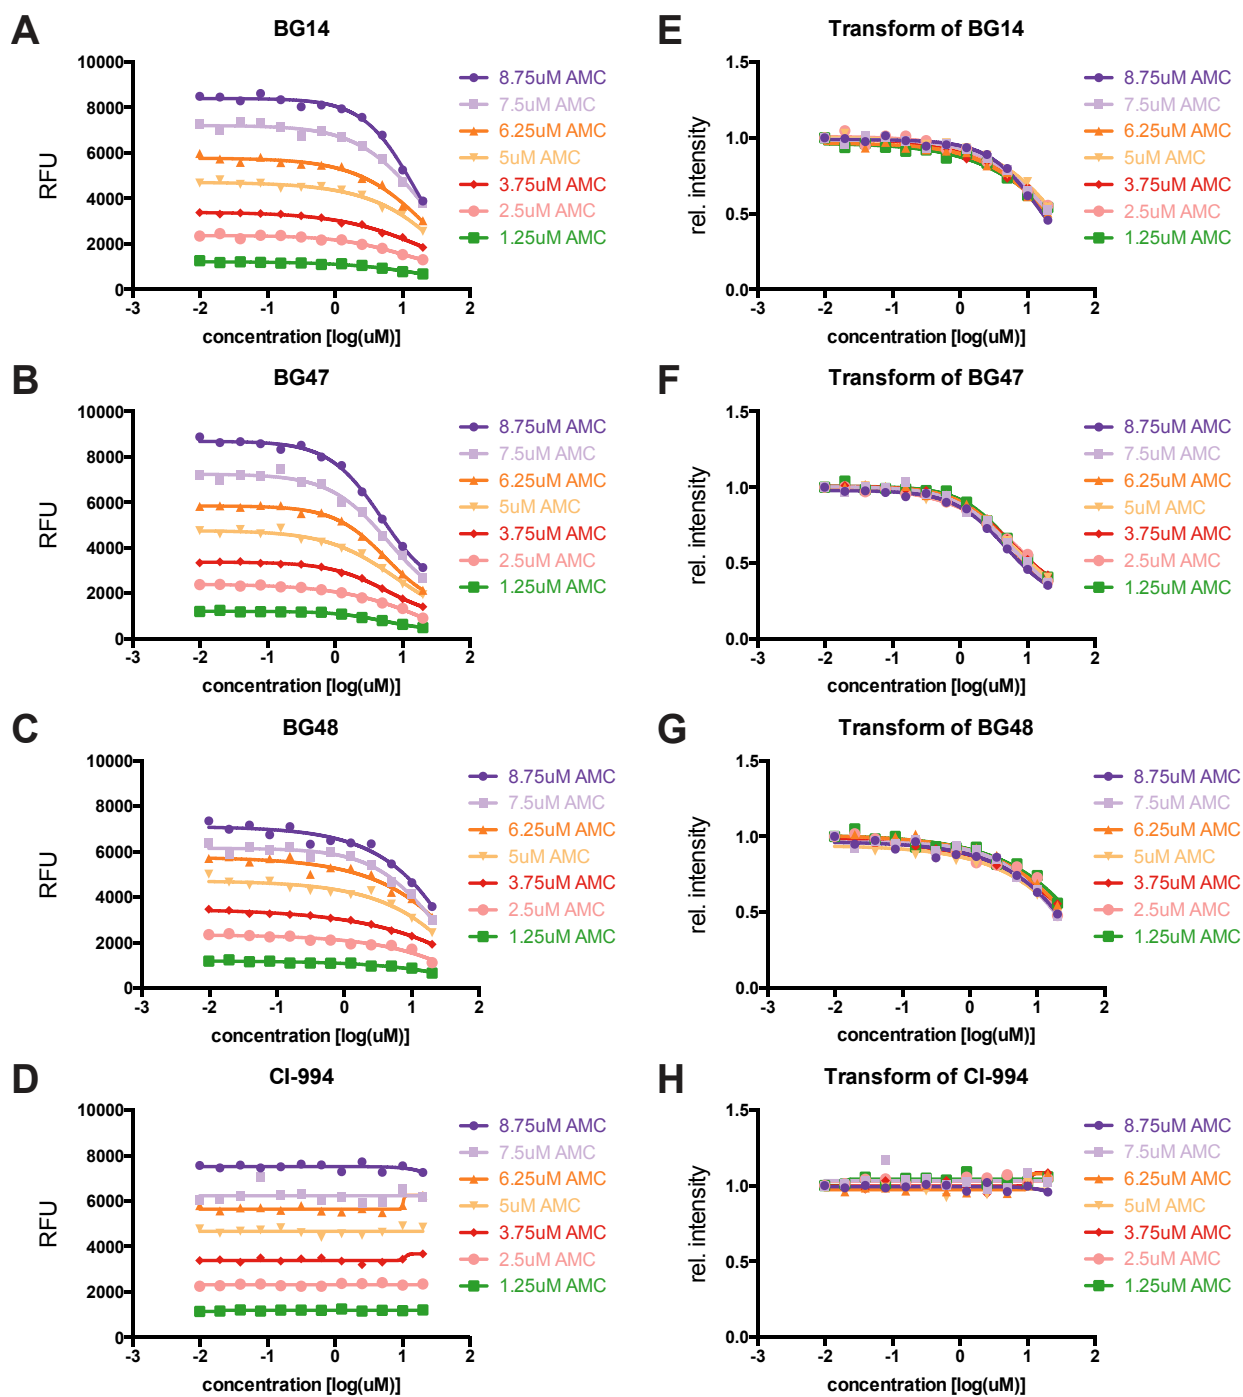

**Supplementary Figure 14. Reduction of 7-AMC fluorescence in the presence of COMET probes.** Since relative signal decrease is linearly correlated with the azobenzene concentration, but independent from the concentration of the substrate and the amount of the generated fluorescent product 7-AMC, standard curves were acquired to corrected raw intensity values of HDAC biochemical assays. Each data point represents a single measurement.



a)

|          |      |      |      |
|----------|------|------|------|
| Weight   | -1   | -1   | -1   |
| Compound | DMSO | DMSO | DMSO |
| Dose     | 0    | 0    | 0    |
| Light    | 0    | 250  | 750  |

|          |       |       |       |       |       |       |       |       |       |
|----------|-------|-------|-------|-------|-------|-------|-------|-------|-------|
| Weight   | -1    | 1     | 2     | -1    | 2     | 3     | -1    | 3     | 4     |
| Compound | Cmpd  |
| Dose     | 0.001 | 0.001 | 0.001 | 0.005 | 0.005 | 0.005 | 0.025 | 0.025 | 0.025 |
| Light    | 0     | 250   | 750   | 0     | 250   | 750   | 0     | 250   | 750   |

b)

|          |      |       |       |       |
|----------|------|-------|-------|-------|
| Weight   | 0    | 1     | 2     | 3     |
| Compound | DMSO | Cmpd  | Cmpd  | Cmpd  |
| Dose     | 0    | 0.001 | 0.005 | 0.025 |
| Light    | 0    | 0     | 0     | 0     |

**Supplementary Figure 15. Templates for Transcriptional analysis.** (a) Template prior to normalization for combined light level and compound concentration dose response. (b) Template prior to normalization for no light dose response.

| ESP for:            | <i>Trans</i> |        | <i>Cis</i> |        | CI-994 |        |
|---------------------|--------------|--------|------------|--------|--------|--------|
|                     | N            | O      | N          | O      | N      | O      |
| lowest energy conf. | -0.809       | -0.674 | -0.743     | -0.653 | -0.721 | -0.664 |
| Boltzmann weighted  | -0.883       | -0.635 | -0.784     | -0.664 | -0.774 | -0.642 |

**Supplementary Figure 16. ESP of the zinc binding nitrogen and oxygen for CI-994, *trans*-BG14 and *cis*-BG14.** The ESP values are given for the lowest energy conformer as well as the Boltzmann weights ESP values are given.

### **Supplementary Data Set 1: Gene expression SNR scores; BG14, CI-994, and C60 response gene IDs**

Data set provides Gene IDs for BG14, CI-994, and C60 response genes as well as their SNR scores in the L1000 assay. Gene lists for each section in the Venn diagram (Fig 5e) are in separate tabs.

### **Supplementary Video 1: LED array**

Video shows footprint of LED array in an incubator and exposure of 470nm light ( $8.5 \text{ mW/cm}^2$ ) modulating at 1 Hz (1s on/7s off) per row both with and without a 96-well plate.
